# Supplementary material for: The Role of Oxymatrine in Amelioration of Acute Lung Injury Subjected to Myocardial I/R by Inhibiting Endoplasmic Reticulum Stress in Diabetic Rats
Source: Hindawi journal article supplement (doi:10.1155/2020/8836904), 2020-01-01
Supplement: f1 [file 8836904.f1.pdf]

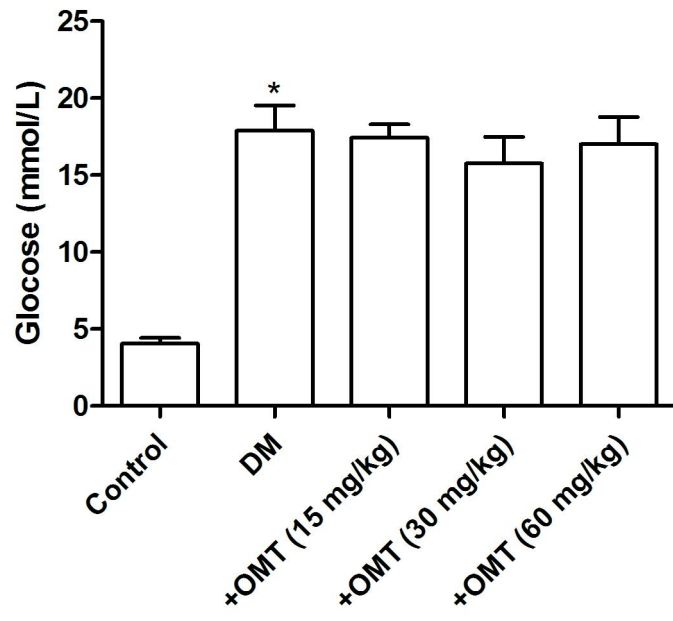

Supplementary figure 1
